# Supplementary material for: FcγRIIB regulates autoantibody responses by limiting marginal zone B cell activation
Source: PubMed Central journal article supplement (PMC9435648; doi:10.1172/jci157250), 2022-09-01
Supplement: jci-132-157250-s131.pdf [file jci-132-157250-s131.pdf]

**Supplementary file (Figure S1-12, Table S1-S3)**





**Figure S2:** Early tolerance checkpoints for ANA in BM and spleen.

The frequency of autoreactive ANA<sup>+</sup> B cells in 10-12 month old control (Ctr) and *Fcgr2b* cKO mice was established using flow cytometry through ANA surface staining. A) Representative example of ANA staining in B cell subsets in the spleen. B-C) Summary of ANA reactivity in B cell subsets in the spleen and bone marrow. B cell subsets were gated as described in Methods.

Data are shown as median with each symbol representing an individual mouse (n=12-17 per group pooled from 3 independent experiments). Asterisks indicate significant differences (\*p<0.05; \*\*p<0.01; \*\*\*p<0.001) obtained using Mann whitney U test.



**Figure S3:** B cell subsets in BM and spleen.

The frequency of B cell subsets in spleen and bone marrow of 10-12 month old control (Ctr) and *Fcgr2b* cKO mice was established using flow cytometry. A) Total splenocyte count. B,C) Frequency of total B220+ B cells in spleen and bone marrow. Representative example of ANA staining in B cell subsets in the spleen. C-M) Summary of B cell subset frequencies in the spleen and bone marrow. B cell subsets were gated as described in Methods.

Data are shown as median with each symbol representing an individual mouse (n=12-17 per group pooled from 3 independent experiments). Asterisks indicate significant differences (\*p < 0.05; \*\*p < 0.01) obtained using Mann whitney U test.



**Figure S4:** IgG class-switched cells, B-1 and MZ B cells in *Fcgr2b* cKO mice.

A,B) Frequency of IgG1+ and IgG2+ B cells in 10-12 month old female control (Ctr) and *Fcgr2b* cKO mice. C-E) Frequency of IgG3+ B cell subsets based on CD38 and GL7 staining. F,G) Representative examples of B cell staining

strategies in spleen and peritoneum. B220<sup>hi</sup> = B-2 cells and B220<sup>o</sup> = B-1 cells, further confirmed as CD21<sup>lo</sup>IgD<sup>-</sup> and separated into B-1a and B-1b based on CD5 (right panel). H-M) Frequency of B-1 cells in spleen (H,I) and total B cells, B-1a, B-1b, and B-2 cells in peritoneum (J-M). N,O) Representative example and summary of MZ frequency within mature CD93<sup>+</sup> B cells.

Data are shown as median with each symbol representing an individual mouse (n=12-17 per group for A-E; n=10-12 per group for H-M; n=8-12 per group for N-O; each pooled from 2-3 independent experiments). Asterisks indicate significant differences (\*p<0.05; \*\*p<0.01; \*\*\*p<0.001) obtained using Mann whitney U test.



**Figure S5:** Characterization of T-dependent response to NP-CGG.

Female Ctr and *Fcgr2b* cKO mice were immunized with NP-CGG in Alum. Serum and splenocytes were obtained after 7 days (except F-H). A,B) Levels of NP-specific antibodies, separated by isotype and subclass. C) Frequency of NP-specific PCs in spleen as percentage of B cells, separated by IgG subclass. D) Representative example of surface NP gating on IgD- B cells (left) and IgG1 and IgG3 staining in IgD-NP+ B cells (middle and right). E) Frequency of IgG3+ NP+ B cells out of total B cells. F-G) Timecourse of serum titers for NP25- and NP2-specific IgG3.

Data are shown as median with each symbol representing an individual mouse (n=7-8 per group for A,B; n=14-16 for C,E; n = 17-20 for F-G; each pooled from 2-3 independent experiments). Asterisks indicate significant differences (\*p<0.05; \*\*p<0.01; \*\*\*p<0.001) obtained using Mann Whitney U test (A-E) or Two-way ANOVA with Bonferroni posthoc test (F-G).



**Figure S6:** Fc $\gamma$ RIIB expression and In vitro activation of follicular (FO) and marginal zone (MZ) B cells using intact and Fab'2 anti-IgM antibodies.

A) Representative example of staining for Fc $\gamma$ RIIB in NP+ IgG1+ and IgG3+ B cells in control mice immunized with NP-CGG. B,C) Fc $\gamma$ RIIB staining intensity in Naïve B cells, and different subsets of IgG1+ and IgG3+ B cells following immunization with NP-Ficoll and NP-CGG (day 7). D-L) FO and MZ B cells were sorted from the spleens of Ctr and *Fcgr2b* cKO mice, followed by stimulation with intact or equimolar concentrations of Fab'2 anti-IgM for 20 hours. Activation was measured by flow cytometry. D-F) Titration of Fab'2 anti-IgM stimulation in FO B cells. G-I) Comparison of activation of FO and MZ B cells in Ctr mice. J-L) Comparison of intact versus Fab'2 anti-IgM in FO and MZ B cells.

Data are shown as median (B,C) or mean  $\pm$  SEM (D-L) (n=8-9 per group for B-C; n=4-7 per group for G-L; each pooled from 2-3 independent experiments; except D-F which was from 1 experiment with 2 mice). Asterisks indicate significant differences (\*p<0.05; \*\*p<0.01; \*\*\*p<0.001) obtained using Mann Whitney U test (B,C) or Two-way ANOVA with Bonferroni posthoc test (G-L).



**Figure S7:** Human MZ-like B cell phenotype, titration of aIgM, and effect of Fab'2 anti-IgM on B cell activation, A) Gating strategy for human Naïve and MZ-like B cells, starting with live CD19+ B cells. Cells were sorted from PBMCs of healthy donors, and analyzed by flow cytometry. B) qPCR for *HOPX* and *SOX7* in sorted B cell subsets, confirming MZ-like phenotype. Relative expression was normalized to *polr2a*. C-I) sorted Naïve and MZ-like B cells which were stimulated with intact anti-IgM or equimolar concentrations of Fab'2 anti-IgM 20 hours. Activation was measured by flow cytometry. C-E) Titration of Fab'2 anti-IgM in sorted Naïve and MZ-like B cells. F-H) Comparison of Naïve and MZ-like B cell activation, stimulated with 2 ug/mL Fab'2 anti-IgM. I) Representative examples of sorted Naïve and MZ-like B cells which were stimulated with 3 ug/mL intact anti-IgM or equimolar concentrations (2 ug/mL) of Fab'2 anti-IgM 20 hours. Activation was measured by flow cytometry.

Data are shown as median with each symbol representing an individual donor (B) or mean +/- SEM (C-H) (n=4-10 per group from 2-5 independent experiments for B; n=4 per group from 2 independent experiments for C-E; n=10 per group from 5 independent experiments for F-H). Asterisks indicate significant differences (\*p<0.05; \*\*p<0.01; \*\*\*p<0.001) obtained using Wilcoxon signed rank test (B) or Two-way ANOVA with Bonferroni posthoc test (C-H).



**Figure S8:** Phosphoflow and calcium flux with Fab'2 anti-IgM.

A,B) PBMCs from healthy donors were stimulated with 10 ug/mL of Fab'2 anti-IgM for 10 min, after which the phosphorylation of signaling molecules was analysed by phosphoflow. Comparison of phosphorylation of Syk and Erk in Naïve versus MZ-like B cells. C-H) PBMCs from healthy donors were labeled with Indo-1 for calcium flux measurements. After 30 seconds of baseline measurement, 75 ug/mL intact anti-IgM or equimolar concentrations (50 ug/mL) of Fab'2 anti-IgM were added and the measurement continued for 2.5 min. 1 ug/mL Ionomycin was used as a positive control. Peak calcium flux and area under the curve (AUC) were calculated using Flowjo. C-E) Representative examples and summary of Ionomycin-induced calcium flux in Naïve and MZ-like B cells gated as in Figure S7A. F) Lack of calcium flux in IgG<sup>+</sup> and IgA<sup>+</sup> B cells following Fab'2 anti-IgM in comparison to Ionomycin as positive control. G,H) Comparison of the peak and AUC of calcium flux in Naïve and MZ-like B cells following stimulation with Fab'2 anti-IgM.

Data are shown as mean  $\pm$  SEM (n=5-6 per group from 2-3 independent experiments). Asterisks indicate significant differences (\* $p$ <0.05; \*\* $p$ <0.01; \*\*\* $p$ <0.001; Ns: not significant) obtained using Two-way ANOVA with Bonferroni posthoc test (A,B) or Mann Whitney U test (D-H).



**Figure S9:** Combined FcγRIIB and

MZ deficiency reverses enhanced

extrafollicular responses.

Female Ctr, *Notch2* cKO, *Fcgr2b* cKO, and *Notch2/Fcgr2b* dKO mice were immunized with NP-Ficoll.

Serum and splenocytes were obtained after 7 days. A) Representative examples of gating for B220hi and B220lo. B,C) Frequencies of follicular (FO) and B-1 cells in spleen. D,E)

Levels of NP-specific IgM and IgG in serum. F,G) Frequency of NP-specific IgM and IgG PCs in spleen. H,I) Frequency of IgG3+ B220hi (B-2) and IgG3+ B220lo (B-1) B cells in spleen.

Data are shown as median with each symbol representing an individual mouse (n=5 per group). Asterisks indicate significant differences (\*p<0.05; \*\*p<0.01; \*\*\*p<0.001)

obtained using Two-way ANOVA with Bonferroni posthoc test.



**Figure S10.** Expression of key markers in UMAP plots.

High dimensional spectral flow cytometry and FlowSOM clustering was used to identify multiple B cell subsets within PBMCs from SLE patients (n=15) and healthy donors (n=10). A) C) Heatmap showing expression levels of markers (columns) for each FlowSOM cluster (rows). Z-score was calculated using the median expression among all samples. B) UMAP was performed on gated live B cells using CD19, CD20, CD21, CD24, CD27, CD38, IgD, and IgM as

input parameters (neighbors = 15, mindist = 0.2). UMAP plots here show concatenated data from all samples (downsampled to 500k events).



**Figure S11.** Phenotype of MZP.

High dimensional spectral flow cytometry was used to identify multiple B cell subsets within PBMCs from SLE patients (n=15) and healthy donors (n=10). Resting Naïve B cells (Rest. Nv.) were gated as Live CD19+ CD27- IgD+ CD38lo CD21+CD24lo cells. MZ B cells (MZ) were gated as Live CD19+ CD27+, IgMhi, CD21+ B cells. MZ precursors (MZP) were gated as Live CD19+ CD27- IgD+ CD38lo CD21+CD24hi cells. Histogram overlay plots here show concatenated data from all samples.

UMAP was performed using CD19, CD20, CD21, CD24, CD27, CD38, IgD, and IgM as input parameters (neighbors = 15, mindist = 0.2). UMAP plots here show concatenated data from all samples (downsampled to 500k events).



**Figure S12.** CD80 expression in all B cell subsets.

High dimensional spectral flow cytometry was used to identify multiple B cell subsets within PBMCs from SLE patients (n=15) and healthy donors (n=10). B cell subsets were identified using FlowSOM clustering as shown in Figure 6B. Expression of CD80 was analysed using Mann Whitney U test. Only significant p value is shown.

**Table S1:** Flow cytometry antibodies

| <b>Target species</b> | <b>Antigen</b> | <b>Fluorochrome</b> | <b>Clone</b> | <b>Company</b> | <b>Catalog Number</b> |
|-----------------------|----------------|---------------------|--------------|----------------|-----------------------|
| Mouse                 | B220           | PE-eF610            | RA3-6B2      | eBioscience    | 61-0452-82            |
| Mouse                 | CD5            | BV421               | 53-7.3       | Biolegend      | 100629                |
| Mouse                 | CD11c          | AF700               | N418         | Biolegend      | 117319                |
| Mouse                 | CD19           | BV711               | 6D5          | Biolegend      | 115555                |
| Mouse                 | CD21           | PerCp-Cy5.5         | 7E9          | Biolegend      | 123416                |
| Mouse                 | CD23           | BV786               | B3B4         | BD Biosciences | 563988                |
| Mouse                 | CD23           | FITC                | B3B4         | Biolegend      | 101605                |
| Mouse                 | CD23           | PECy7               | B3B4         | eBioscience    | 25-0232-82            |
| Mouse                 | CD24           | PE-Cy7              | M1/69        | eBioscience    | 25-0242-80            |
| Mouse                 | CD32b          | APC                 | AT130-2      | eBioscience    | 17-0321-82            |
| Mouse                 | CD32b          | PE                  | AT130-2      | eBioscience    | 12-0321-80            |
| Mouse                 | CD38           | BV711               | 90/CD38      | BD Biosciences | 740697                |
| Mouse                 | CD38           | PE                  | 90/CD38      | BD Biosciences | 553764                |
| Mouse                 | CD43           | FITC                | S7           | BD Biosciences | 561856                |
| Mouse                 | CD80           | FITC                | 16-10A1      | BD Biosciences | 561954                |
| Mouse                 | CD86           | AF700               | GL-1         | Biolegend      | 105024                |
| Mouse                 | CD93           | BV421               | AA4.1        | BD Biosciences | 747716                |
| Mouse                 | CD93           | PE                  | AA4.1        | eBioscience    | 12-5892-81            |
| Mouse                 | CD93           | PE-Cy7              | AA4.1        | BioLegend      | 136506                |
| Mouse                 | CD95           | BV421               | Jo2          | BD Biosciences | 562633                |
| Mouse                 | CD95           | PE-Cy7              | Jo2          | BD Biosciences | 557653                |
| Mouse                 | CD138          | BV786               | 281-2        | BD Biosciences | 740880                |
| Mouse                 | GL7            | eF450               | GL7          | eBioscience    | 48-5902-82            |
| Mouse                 | GL7            | FITC                | GL7          | Biolegend      | 144604                |
| Mouse                 | IAd            | APC                 | AMS-32.1     | eBioscience    | 17-5323-80            |
| Mouse                 | IgA            | FITC                | C10-3        | BD Biosciences | 559354                |
| Mouse                 | IgD            | APC-Fire750         | 11-26c.2a    | Biolegend      | 405744                |
| Mouse                 | IgD            | PE                  | 11-26C.1     | BD Biosciences | 558597                |
| Mouse                 | IgG1           | BV605               | A85-1        | BD Biosciences | 563285                |

| <b>Target species</b> | <b>Antigen</b>                  | <b>Fluorochrome</b> | <b>Clone</b> | <b>Company</b> | <b>Catalog Number</b> |
|-----------------------|---------------------------------|---------------------|--------------|----------------|-----------------------|
| Mouse                 | IgG1                            | FITC                | A85-1        | BD Biosciences | 553443                |
| Mouse                 | IgG2                            | BV711               | R2-40        | BD Biosciences | 744296                |
| Mouse                 | IgG2                            | BV786               | R2-40        | BD Biosciences | 744297                |
| Mouse                 | IgG3                            | BV421               | R40-82       | BD Biosciences | 565808                |
| Mouse                 | IgG3                            | BV605               | R40-82       | BD Biosciences | 744135                |
| Mouse                 | IgM                             | APC-eF780           | II/41        | eBioscience    | 47-5790-82            |
| Mouse                 | IgM                             | eF450               | II/41        | eBioscience    | 48-5790-82            |
| Mouse                 | IgM                             | PE                  | II/41        | eBioscience    | 12-5790-81            |
| Mouse                 | IgM                             | PE-Cy7              | eB121-15F9   | eBioscience    | 25-5890-82            |
| Mouse/<br>Human       | Erk1/2<br>(pT202/pY204)         | AF647               | 20A          | BD Biosciences | 612593                |
| Mouse/<br>Human       | Syk (pY348)                     | PE                  | I120-722     | BD Biosciences | 558529                |
| Human                 | CD3                             | BV510               | UCHT1        | Biologend      | 300447                |
| Human                 | CD14                            | BV510               | M5E2         | Biologend      | 301841                |
| Human                 | CD19                            | PE-CF594            | HIB19        | BD Biosciences | 562321                |
| Human                 | CD19                            | PerCp-eF710         | SJ25C1       | eBioscience    | 46-0198-42            |
| Human                 | CD27                            | BV421               | M-T271       | BD Biosciences | 562513                |
| Human                 | CD32                            | PE                  | FLI8.26      | BD Biosciences | 550586                |
| Human                 | CD38                            | BV711               | HIT2         | Biologend      | 303528                |
| Human                 | CD80                            | BB515               | L307.4       | BD Biosciences | 565008                |
| Human                 | CD86                            | PE                  | 2331 /FUN-1  | BD Biosciences | 555658                |
| Human                 | HLA-DR                          | BV605               | L243         | Biologend      | 307640                |
| Human                 | IgA                             | PE-Vio770           | IS11-8E10    | Miltenyi       | 130-114-003           |
| Human                 | IgD                             | AF700               | IA6-2        | Biologend      | 348229                |
| Human                 | IgD                             | PE-CF549            | IA6-2        | BD Biosciences | 562540                |
| Human                 | IgG                             | BV605               | G18-145      | BD Biosciences | 563246                |
| Human                 | IgG                             | BV785               | G18-145      | BD Biosciences | 564230                |
| Human                 | IgM                             | FITC                | MHM-88       | Biologend      | 314506                |
|                       | Mouse IgG1,k<br>isotype control | AF647               | MOPC-21      | Biologend      | 400130                |

| <b>Target species</b> | <b>Antigen</b>                | <b>Fluorochrome</b> | <b>Clone</b> | <b>Company</b> | <b>Catalog Number</b> |
|-----------------------|-------------------------------|---------------------|--------------|----------------|-----------------------|
|                       | Mouse IgG1,k isotype control  | BB515               | X40          | BD Biosciences | 564416                |
|                       | Mouse IgG1,k isotype control  | PE                  | (P3.6.2.8.1  | eBioscience    | 12-4714-82            |
|                       | Mouse IgG2a,k isotype control | APC                 | eBM2a        | eBioscience    | 17-4724-81            |
|                       | Mouse IgG2a,k isotype control | BV605               | G155-178     | BD Biosciences | 562778                |

**Table S2:** Spectral flow cytometry antibodies

| <b>Target species</b> | <b>Antigen</b> | <b>Fluorochrome</b> | <b>Clone</b> | <b>Company</b> | <b>Catalog Number</b> |
|-----------------------|----------------|---------------------|--------------|----------------|-----------------------|
| Human                 | CD3            | eFluor 506          | UCHT1        | eBioscience    | 69-0038-42            |
| Human                 | CD14           | eFluor 506          | 61D3         | eBioscience    | 69-0149-42            |
| Human                 | CD19           | BV570               | HIB19        | Biolegend      | 302236                |
| Human                 | CD27           | APC-Fire810         | QA17A18      | Biolegend      | 393214                |
| Human                 | CD38           | BUV563              | HB7          | BD             | 741446                |
| Human                 | CD21           | BUV805              | B-ly4        | BD             | 742008                |
| Human                 | CD24           | BUV496              | ML5          | BD             | 741143                |
| Human                 | CD20           | BUV395              | 2H7          | BD             | 563782                |
| Human                 | IgD            | BV480               | IA6-2        | BD             | 566138                |
| Human                 | IgM            | SuperBright436      | SA-DA4       | eBioscience    | 62-9998-42            |
| Human                 | IgG            | BV421               | G18-145      | BD             | 562581                |
| Human                 | IgA            | VioBlue             | IS11-8E10    | Miltenyi       | 130-113-479           |
| Human                 | CD45RB         | BUV615              | MT4 (6B6)    | BD             | 751482                |
| Human                 | CD138          | BV711               | MI15         | Biolegend      | 356521                |
| Human                 | CXCR5          | BV750               | J252D4       | Biolegend      | 356941                |
| Human                 | CD11c          | FITC                | 3.9          | Biolegend      | 301604                |
| Human                 | HLA-DR         | PE-Fire810          | L243         | Biolegend      | 307683                |
| Human                 | CD86           | BV650               | IT2.2        | Biolegend      | 305427                |

| Target species | Antigen      | Fluorochrome | Clone   | Company   | Catalog Number              |
|----------------|--------------|--------------|---------|-----------|-----------------------------|
| Human          | CD40         | PerCpCy5.5   | 5C3     | Biolegend | 334315                      |
| Human          | CD80         | APC-R700     | L307.4  | BD        | 565157                      |
| Human          | CD69         | PE-Fire640   | FN50    | Biolegend | 310959                      |
| Human          | CD1d         | PE-Cy7       | 51.1    | Biolegend | 350309                      |
| Human          | CD197        | APC-Fire750  | G043H7  | Biolegend | 353245                      |
| Human          | CD1c (BDCA1) | PE           | AD5-8E7 | Miltenyi  | 120-000-889                 |
| Human          | CD32B/C      | AF647        | 4F5     | Biolegend | Custom labeled by Biolegend |

**Table S3:** Demographic and clinical characteristics

|                                 | SLE<br>(n=15)                 | Healthy donor<br>(n=10) | P value            |
|---------------------------------|-------------------------------|-------------------------|--------------------|
| Age                             | 55 (21-76)                    | 51 (28-66)              | 0.803 <sup>1</sup> |
| Sex (n f/m (% female))          | 13/2 (87%)                    | 9/1 (90%)               | 1.000 <sup>2</sup> |
| Age at diagnosis                | 33 (13-54)                    |                         |                    |
| Disease duration                | 24 (2-42)                     |                         |                    |
| SLEDAI-2K                       | 8 (0-24)                      |                         |                    |
| Clinical symptoms               |                               |                         |                    |
| Mucocutaneous                   | 10 (67%)                      |                         |                    |
| Arthritis                       | 5 (33%)                       |                         |                    |
| Renal                           | 3 (20%)                       |                         |                    |
| Other                           | 4 (27%)                       |                         |                    |
| Previous renal disease (n (%))  | 6 (40%)                       |                         |                    |
| Class                           | Class III/IV, IV <sup>3</sup> |                         |                    |
| Current medications             |                               |                         |                    |
| PDN                             | 4 (27%)                       |                         |                    |
| HCQ                             | 12 (80%)                      |                         |                    |
| Immunosuppressants <sup>4</sup> | 6 (40%)                       |                         |                    |

|                                                    | <b>SLE<br/>(n=15)</b>                          | <b>Healthy donor<br/>(n=10)</b> | <b>P value</b> |
|----------------------------------------------------|------------------------------------------------|---------------------------------|----------------|
| Anti-dsDNA IgG<br>IU/mL<br>% positive              | 14.1 (9.8-292.1)<br>4 (27%)                    |                                 |                |
| Complement<br>C3 (g/L)<br>C4 (mg/L)<br>% low C3/C4 | 1.072 (0.673-1.425)<br>209 (86-459)<br>4 (27%) |                                 |                |
| Platelets<br>x10e3/uL<br>% low (<100)              | 266 (86-391)<br>1 (7%)                         |                                 |                |
| WBC<br>x10e3/uL<br>% low (<3)                      | 6.28 (3.65-9.46)<br>0 (0%)                     |                                 |                |
| Lymphocytes<br>x10e3/uL<br>% low (<1)              | 1.15 (0.49-2.81)<br>5 (38%)                    |                                 |                |

**Table S3:** Patient and healthy donor characteristics for samples included in spectral flow cytometry analysis. Values are shown as median with range in brackets, unless indicated otherwise.

<sup>1</sup>Obtained using Mann Whitney U test.

<sup>2</sup>Obtained using Fisher's exact test.

<sup>3</sup>One case of suspected lupus nephritis not biopsy-proven.

<sup>4</sup>These immunosuppressants include MMF, Azathioprine and Methotrexate.
